# Supplementary material for: Tolerance to Haemophilus influenzae infection in human epithelial cells: Insights from a primary cell-based model
Source: PubMed Central journal article supplement (PMC11239077; doi:10.1371/journal.ppat.1012282), 2024-07-11

**Panel A:**

Day1

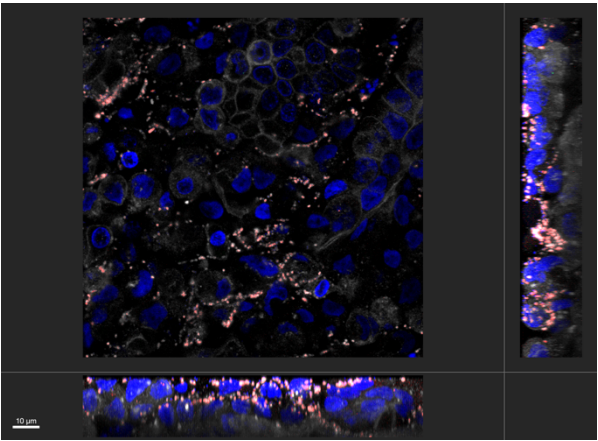

Day 3

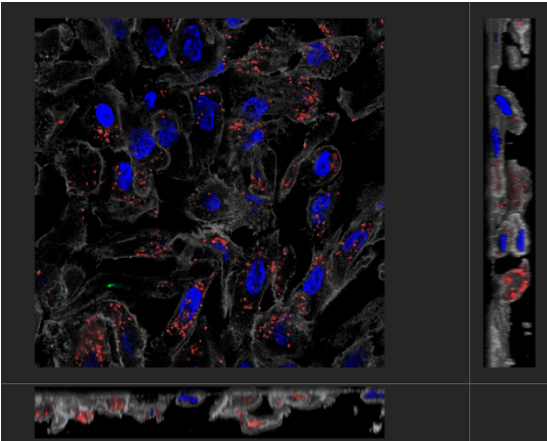

Day 7

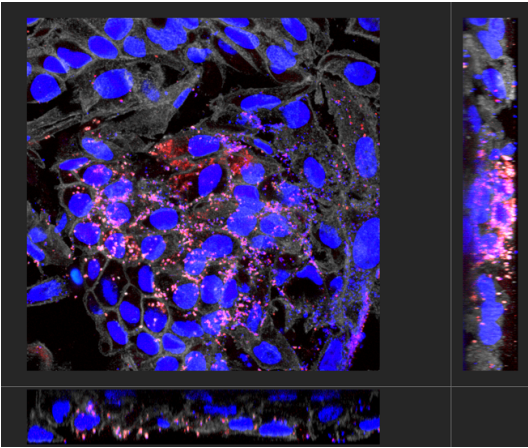

Day14

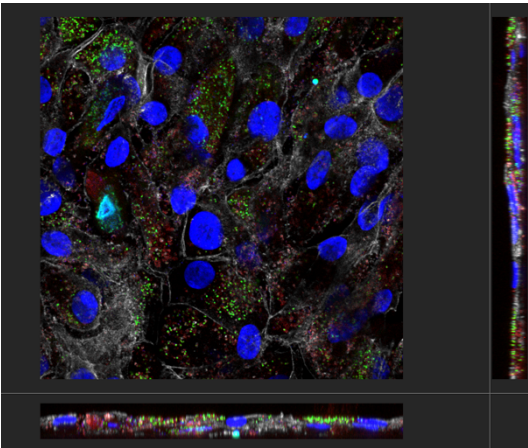

Uninfected

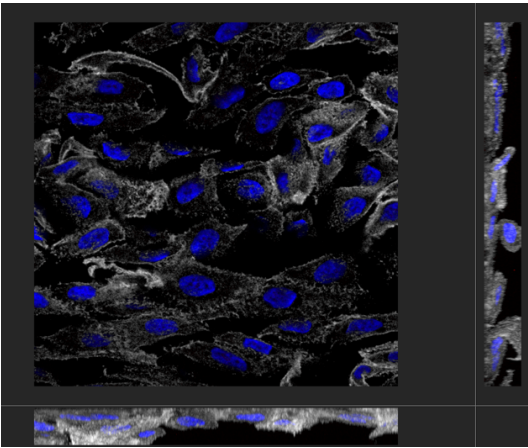

**Panel B:**

Day1

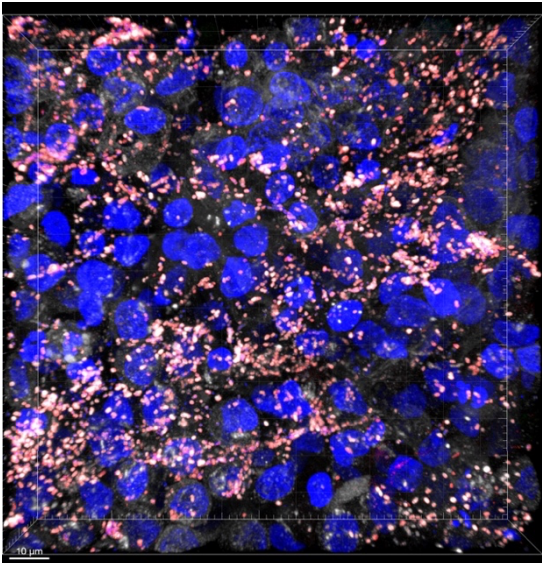

Day3

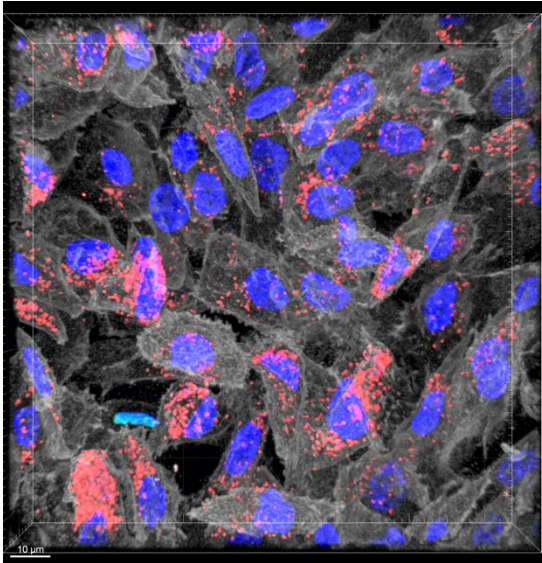

Day7

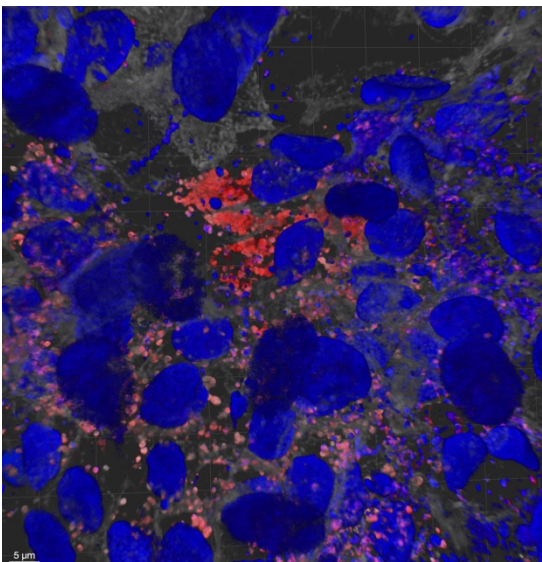

Day14

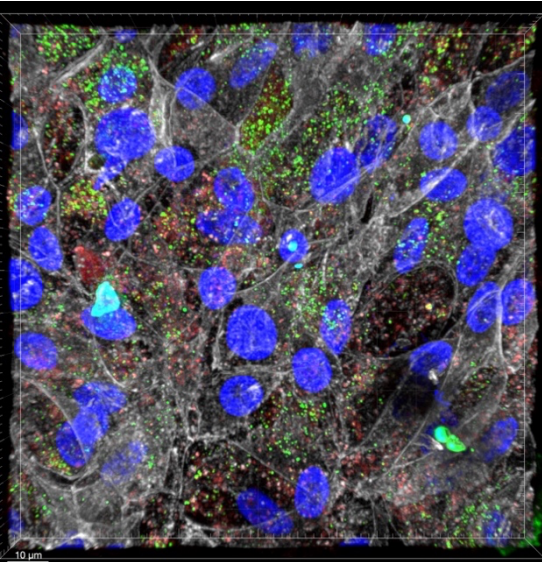

uninfected

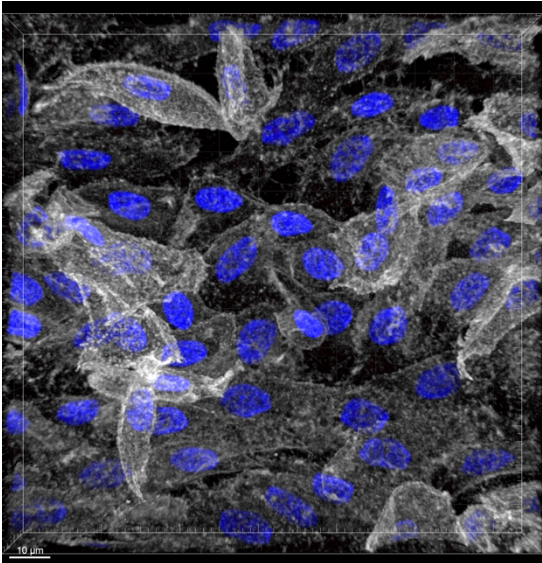

Supplement: ppat.1012282.s002.pdf [file ppat.1012282.s002.pdf]
