# Supplementary material for: Tolerance to Haemophilus influenzae infection in human epithelial cells: Insights from a primary cell-based model
Source: PubMed Central journal article supplement (PMC11239077; doi:10.1371/journal.ppat.1012282), 2024-07-11

# A Day1-Day0

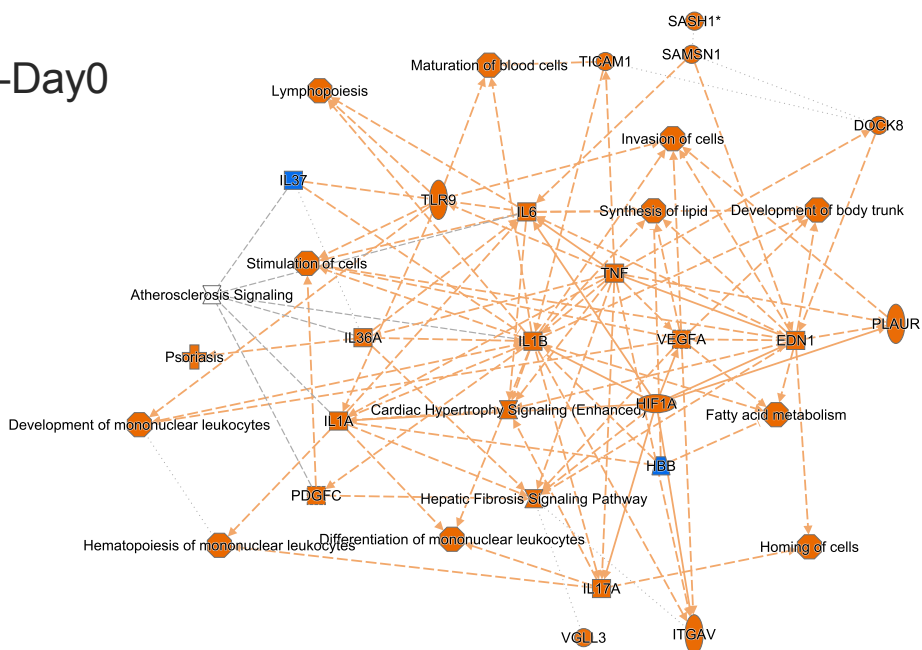

# Day3-Day1

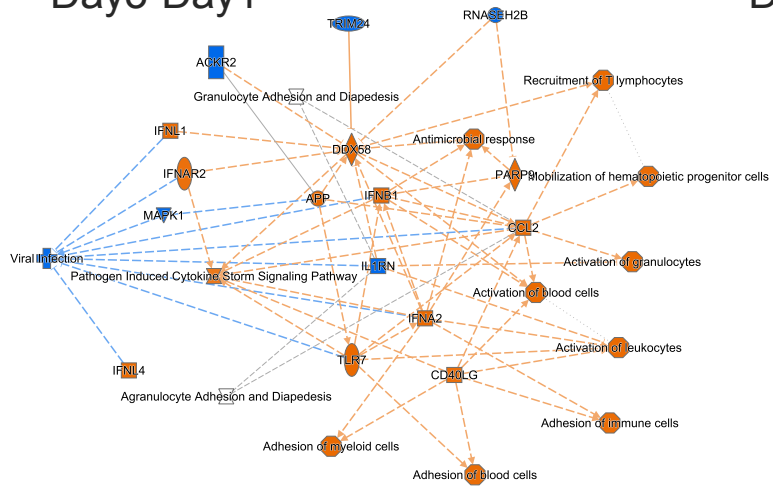

# Day7-Day3

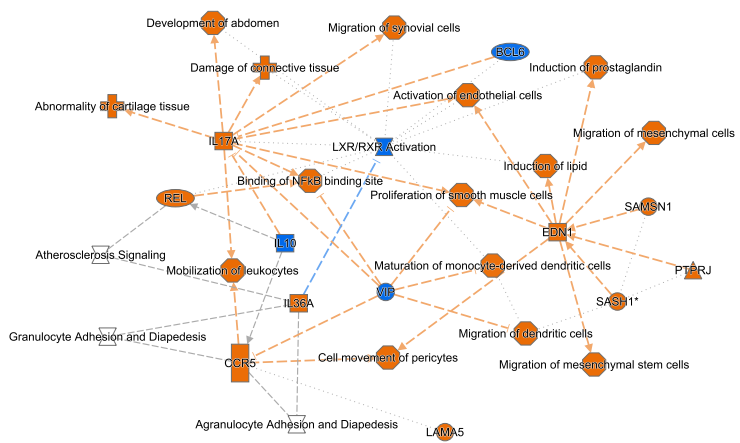

# B Day1-Day0

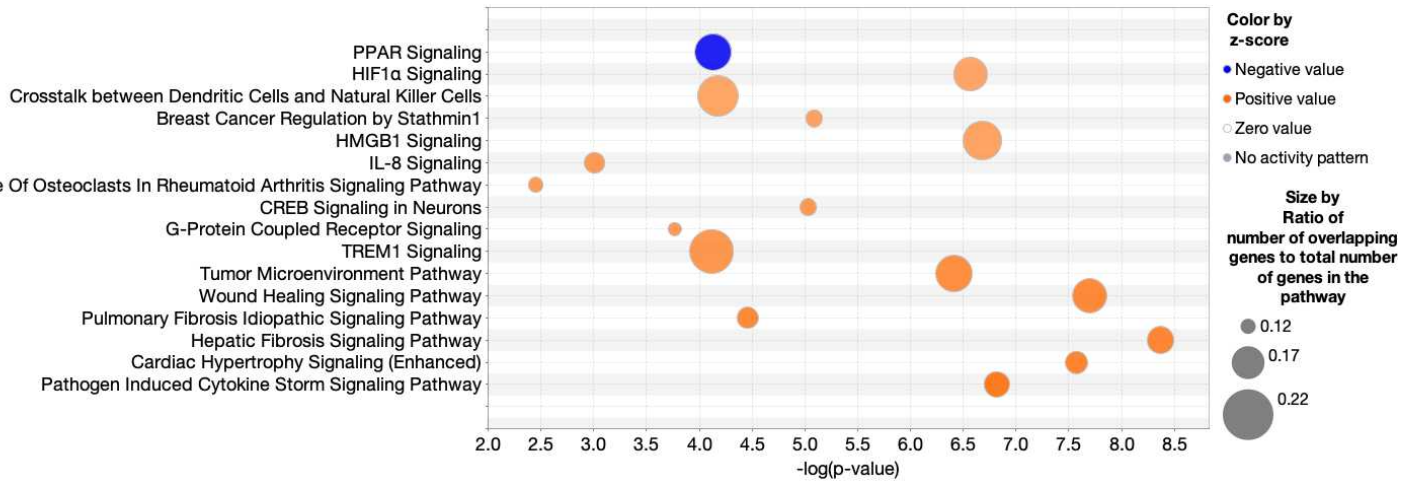

# Day3-Day1

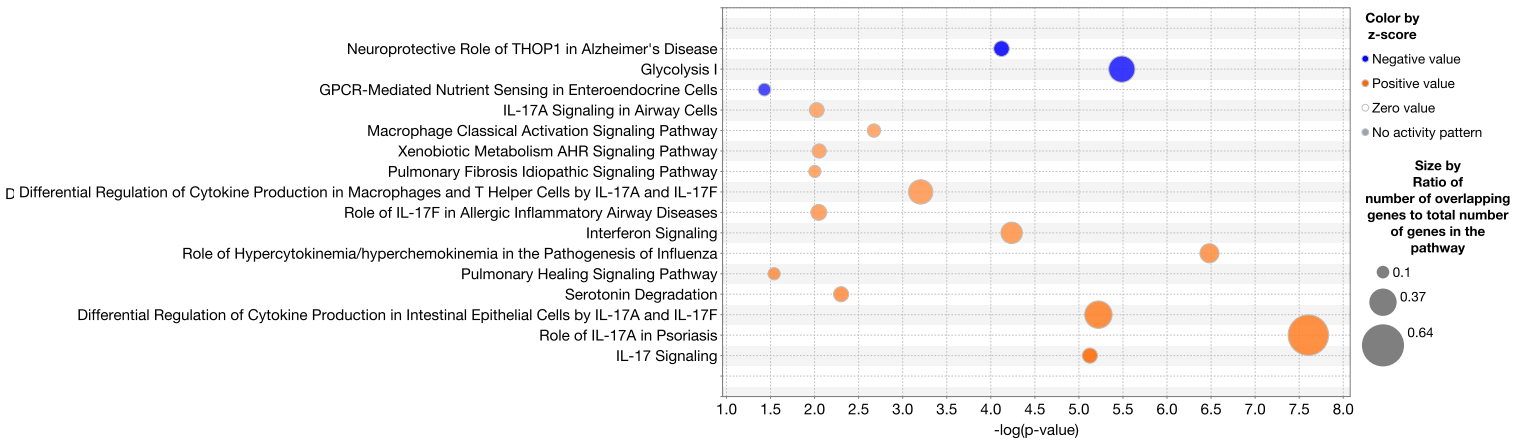

# Day7-Day3

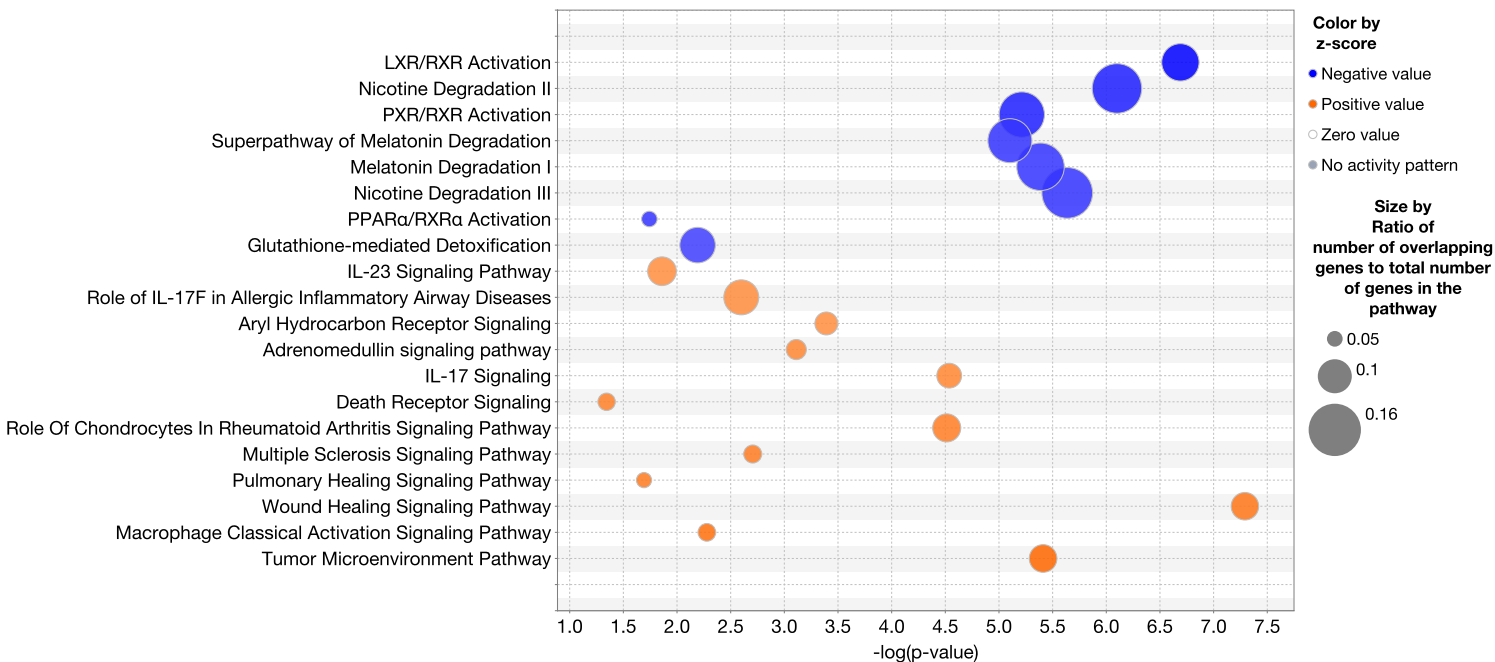

C

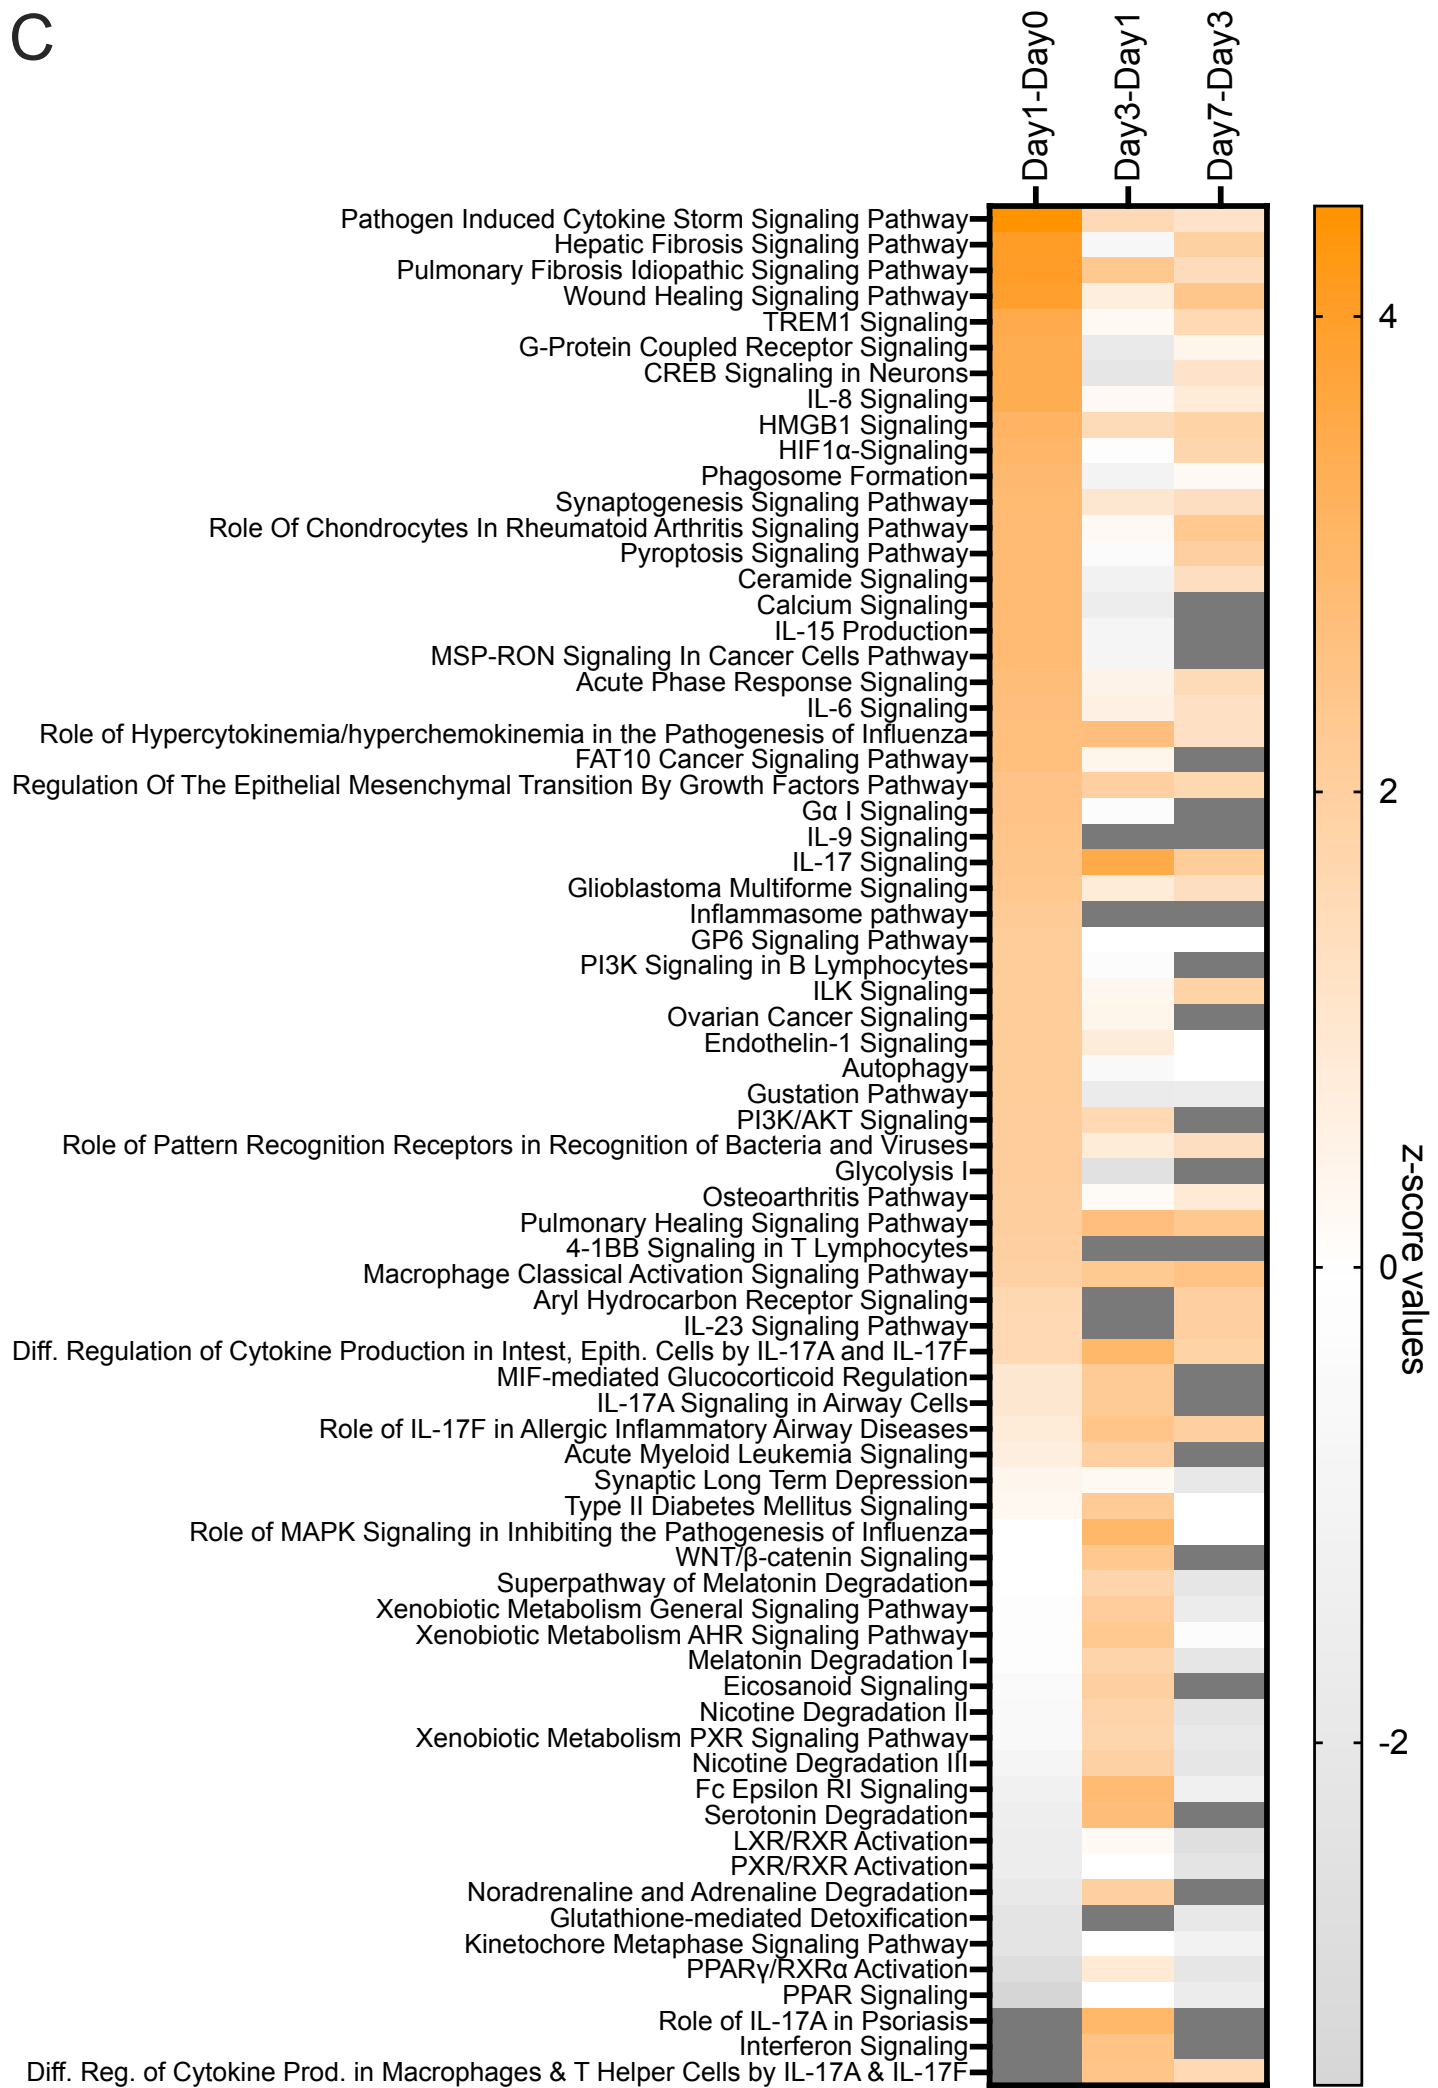

D

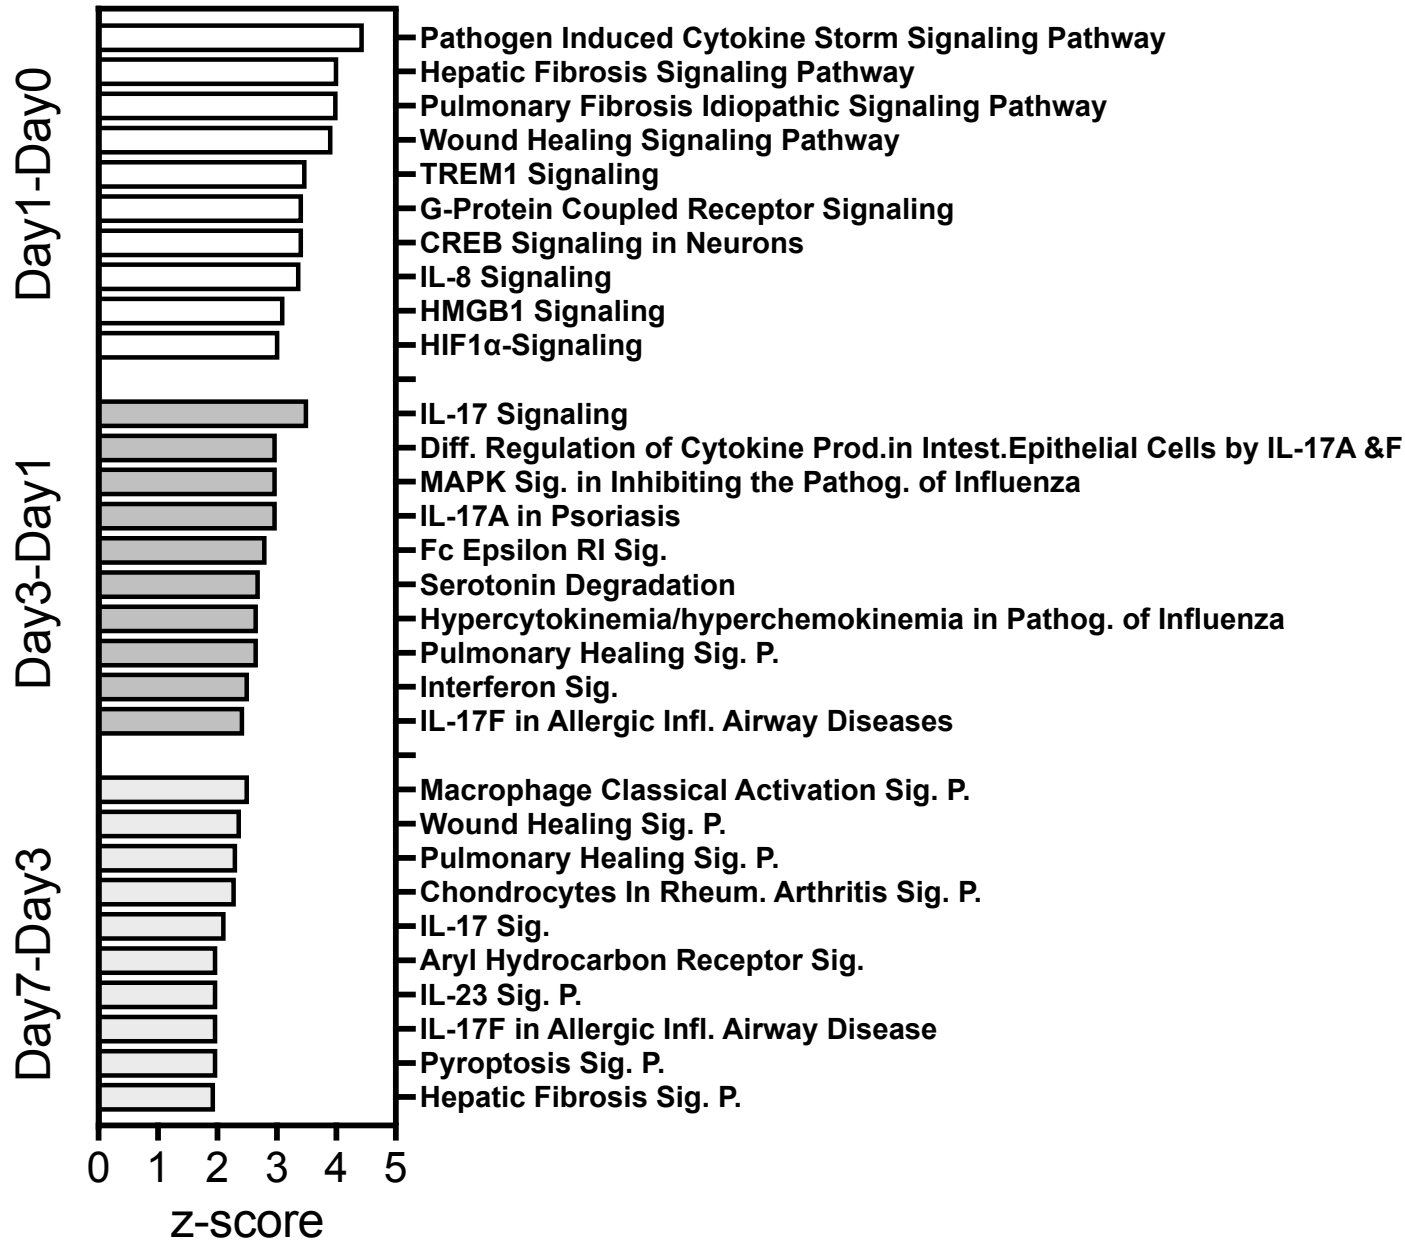

Supplement: ppat.1012282.s004.pdf [file ppat.1012282.s004.pdf]
